**TITLE:** INDIRECT CALORIMETRY: COMPARISON OF TWO METHODS IN VENTILATED PATIENTS  
**AUTHORS:** G. Oschmann, U. Föhring, M.D., M. Schäfer, M.D., L. Hannemann, M.D., K. Reinhardt, M.D.  
**AFFILIATION:** Dep. of Anesthesiology and Intensive Care Medicine, Klinikum Steglitz, Free University of Berlin, Hindenburgdamm 30, D-1000 Berlin 45

Indirect calorimetric methods and continuous monitoring of oxygen uptake are becoming increasingly important in research as well as on intensive care units. Priority must be given to methodological problems ( $\text{FIO}_2$ , PEEP, moisture, changing minute volumes), particularly with in vivo measurements. Our study examines the validity of two measurement principles and their reliability in predicting derived parameters.

In operative intensive care patients ( $n=15$ ) with pulmonary-artery catheters on controlled ventilation, 255 measuring cycles were simultaneously evaluated with the Deltatrac<sup>TM</sup> Metabolic Monitor (Datex Instrumentarium, Helsinki, Finland) and the MMC Horizon<sup>TM</sup> (SensorMedics, Anaheim, California). All measurements were performed under steady-state conditions. For artificial respiration (PEEP 0-10cm  $\text{H}_2\text{O}$ , I:E-quotient 1:1.5 to 1:2,  $\text{FIO}_2$  between 0.21 and 0.6) a Servo Ventilator 900C was used. During 40 measurements, we additionally recorded a hemodynamic profile and calculated  $\text{VO}_2$  and  $\text{DO}_2$  according to the Fick principle from the arteriovenous  $\text{O}_2$  difference and the cardiac output measured by thermodilution.

Both devices measure the  $\text{VO}_2$  too high compared to calculations according to the Fick principle (Mean  $\pm 2\text{SD}$ : Deltatrac  $+10.7 \text{ ml/min} \pm 48$ ; MMC Horizon  $+50.7 \text{ ml/min} \pm 92$ ), the MMC Horizon measurements being disproportionately high with increasing values.  $\text{FIO}_2$  measurements are the same with both apparatuses ( $r^2=0.996$ ).  $\text{FeO}_2$ ,

however, is likewise measured too high by MMC; the Deltatrac to MMC ratio for  $\text{FIO}_2\text{-FeO}_2$  shows increasing deviations at higher values ( $y = 0.28 + 0.798x$ ,  $r^2=0.944$ ). We observed the same tendency in comparing the volume measurement ( $y=-0.157 + 0.961x$ ,  $r^2=0.97$ ). Thus higher values are measured for  $\text{VO}_2$  with the MMC than with the Deltatrac ( $y=35.07 + 1.02x$ ,  $r^2=0.648$ ). The same is true for the  $\text{VCO}_2$  of MMC, again with a disproportionate increase in the upper range.

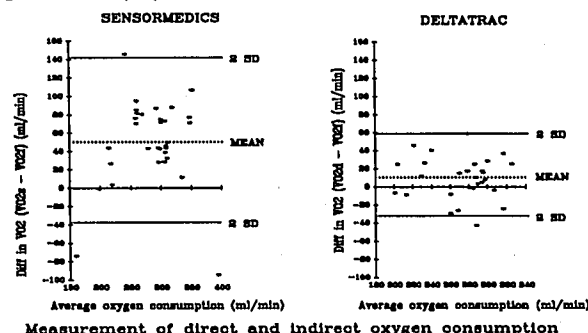

Compared to Deltatrac and calculated values for  $\text{VO}_2$  and  $\text{VCO}_2$  the results from MMC Horizon were too high. Measured against the standard, the mixing-chamber principle (Deltatrac) has proven to be more precise and less susceptible to trouble than the breath-by-breath system (MMC Horizon), though, in accordance with the literature<sup>1,2</sup>, the values observed here were too high as well. A clinical and scientific application of the MMC Horizon is not justifiable in ventilated patients.

References: 1. Crit. Care Med 1987; 15 (2) 144-7  
2. Crit. Care Med 1989; 17 (10) 1041-7

**TITLE:** DETECTION AND QUANTIFICATION OF MIXED VOLATILE ANESTHETICS BY POET®II AND A MASS SPECTROMETER

**AUTHOR:** L.C. Jameson, M.D.  
**AFFILIATION:** Anesthesia Department, University of Wisconsin, Madison, WI 53792

Measurement of volatile anesthetic vapor (VA) has become a common occurrence. Until recently only the multiplexed mass spectrometer could differentiate between and quantitate mixtures of volatile anesthetics. The risks of unknown VA mixtures in agent specific vaporizers is well documented (Bruce DL, Anesthesiology 60:342-346, 1984). This risk may be increased since non-agent specific spectrometers will report erroneous values when an unexpected VA is present. This study was performed to compare the infrared POET®II Multigas Analyzer's (Criticare Systems) ability to identify and quantitate mixed VA with a stand-alone mass spectrometer (Medical Gas Analyzer 1100, Marquette Gas Analysis Corp.) (MGA).

**METHODS:** A vernitrol vaporizer was filled with 1:1 volumetric mixtures of halothane (H), isoflurane (I), and enflurane (E) in the following combinations: E:I, E:H, H:I, and E:H:I. Oxygen flow through the vaporizer was set at 100 cc/min and the background gas flow (BGF) set on the OHIO Heidbrink Compact anesthesia machine was 2 and 5 l/min of  $\text{O}_2$ . The POET®II (software vers. 2.3) and MGA were calibrated as directed by the manufacturer. MGA was used as the standard thus 3 additional VA calibration points (Scott Corp.) (0.5%, 1.0%, 1.5%) were used. The test gas flow was through 100 cm suction tubing, a modified respiratory gas sampler and into a vented anesthesia bag. The delay from turning the vaporizer on to its appearance at the sample port was  $<0.5 \text{ sec}$ . Each instrument used its standard sampling attachments and sampling locations were the same distance from the gas inlet. Ten value points were recorded on 10 separate occasions ( $n=100$  points) for each VA combination. The following data was obtained: 1) MGA 1100 VA readings at time the POET®II reported the VA values, 2) time to POET®II report, 3)

POET®II reported values. Significance was  $p<0.05$  using paired T-test for repeated values.

**RESULTS:** In this laboratory situation, there were no differences between units in the reported VA values for either of the BGF (Table 1). The

Table 1: Volatile Anesthetic Values Reported at Time of Identification

|          | VA Mix | Background flow: 2 L/min<br>Value Reported (%) |           |           | Background flow: 5 L/min<br>Value Reported (%) |           |           |
|----------|--------|------------------------------------------------|-----------|-----------|------------------------------------------------|-----------|-----------|
|          |        | E                                              | H         | I         | E                                              | H         | I         |
| MGA 1100 | E:H    | 0.88±0.01                                      | 1.22±0.01 |           | 0.36±0.003                                     | 0.51±0.01 |           |
| POET     | E:H    | 0.8±0.0                                        | 1.3±0.0   |           | 0.3±0.0                                        | 0.6±0.0   |           |
| MGA 1100 | E:I    | 0.93±0.01                                      |           | 1.02±0.01 | 0.38±0.02                                      |           | 0.40±0.04 |
| POET     | E:I    | 0.9±0.0                                        |           | 1.0±0.0   | 0.4±0.05                                       |           | 0.4±0.05  |
| MGA 1100 | H:I    |                                                | 1.47±0.01 | 1.16±0.01 |                                                | 0.55±0.08 | 0.45±0.05 |
| POET     | H:I    |                                                | 1.5±0.03  | 1.1±0.05  |                                                | 0.6±0.09  | 0.5±0.05  |
| MGA 1100 | E,H,I  | 0.63±0.01                                      | 0.93±0.01 | 0.85±0.01 | 0.26±0.01                                      | 0.38±0.02 | 0.36±0.02 |
| POET     | E,H,I  | 0.6±0.03                                       | 1.0±0.1   | 0.9±0.05  | 0.1±0.1                                        | 0.4±0.0   | 0.4±0.1   |

VA-Volatile Anesthetic, E-Enflurane, H-Halothane, I-Isoflurane

POET®II's overall mean time to identification and measurement of the VA's was  $13.3 \pm 0.5 \text{ sec}$ . The time was not affected by the specific VA mix even when 3 agents were present. The time was not affected by the BGF (Fig. 1).

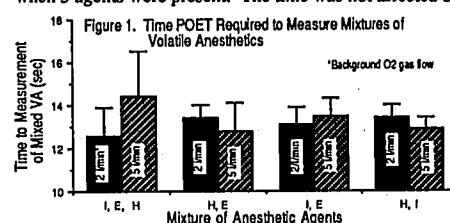

provided very similar concentrations for all vapors present. Large differences between individual VA in the mix may change results. This study did not examine the significant effect ventilation waveform could have on the POET®II's performance.

**DISCUSSION:** Under these experimental conditions the POET®II provided accurate rapid identification and measurement of mixed VA. The VA mixture used
